# Supplementary material for: In Vivo Toxicity of Solasonine and Its Effects on cyp450 Family Gene Expression in the Livers of Male Mice from Four Strains
Source: MDPI journal article supplement (doi:10.3390/toxins10120487), 2018-11-23
Supplement: s1 [file s1]

# Supplementary Materials: In Vivo Toxicity of Solasonine and Its Effects on cyp450 Family Gene Expression in the Livers of Male Mice from Four Strains

Youbao Zhong, Shanshan Li, Liling Chen, Zhiyong Liu, Xiaoquan Luo, Peng Xu and Lai Chen

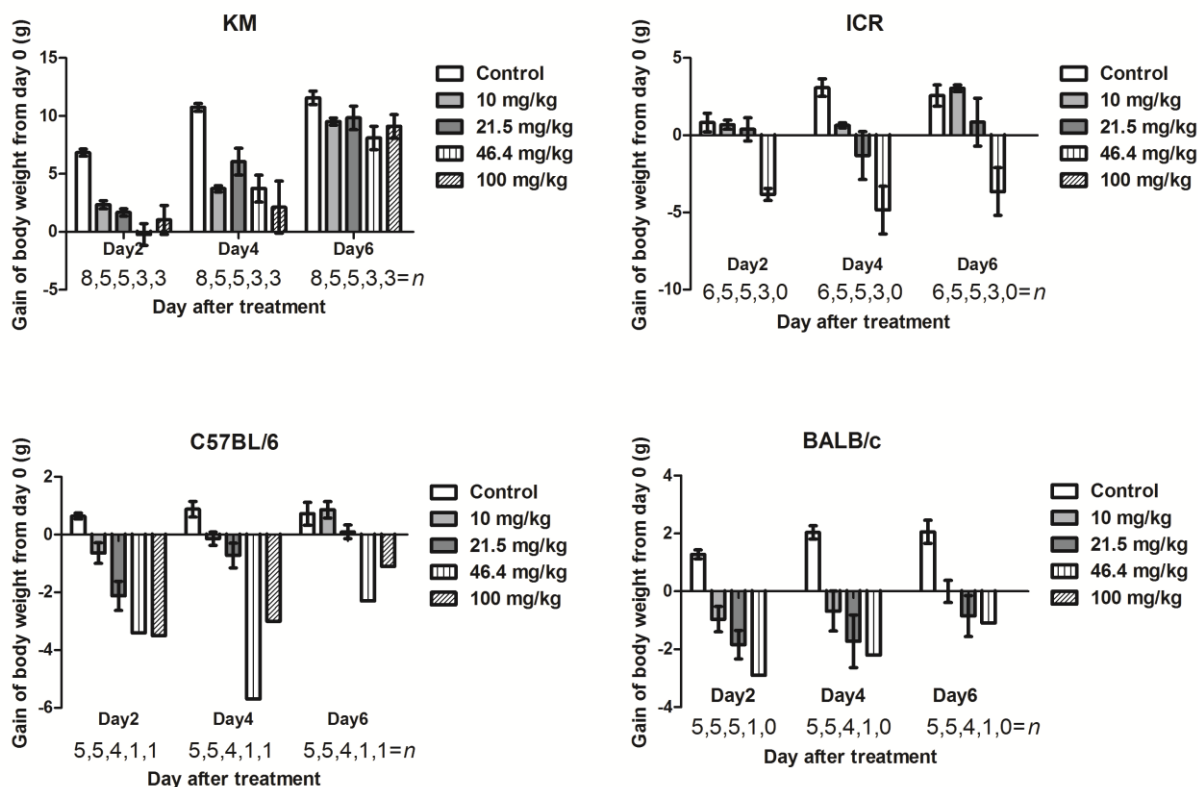

**Figure S1.** Changes in body weight of male mice from four strains over one week. Mice of each strain—KM, ICR, C57BL/6, or BALB/c—were treated by intraperitoneal injection with solasonine at a dose of 100, 46.4, 21.5, or 10 mg/kg, or with vehicle (control), and then the body weight of each living mouse was weighed and recorded and the average increase in body weight of each mouse from Day 0 were shown.

**Table S1.** Primers for real-time PCR of cyp450 family genes and rpl13a.

| Gene    | Direction | Primer Sequence      |
|---------|-----------|----------------------|
| cyp1a2  | F         | CCTCTATGCCAACACGTGC  |
|         | R         | CCTGCTTGCTGATCCACATC |
| cyp2e1  | F         | TGGGGAAACAGGGTAATGAG |
|         | R         | GCACAGCCAATCAGAAAGGT |
| cyp3a11 | F         | AGAAGGCAAAGAAAGGCAAG |
|         | R         | CTCTGGGTTGTTGAGGGAAT |
| cyp2d11 | F         | TCTCAGTGCCTGATGGACAG |
|         | R         | CACAGAGCTGGTAGGGGAAG |

|         |   |                         |
|---------|---|-------------------------|
| cyp2d12 | F | ACACTGCTGACCGCCCTCCA    |
|         | R | TGCTCTCGCCACTCAGGTCCA   |
| cyp4f37 | F | ACTGAAGCAGGCCAGACTTACCG |
|         | R | GGGGGCAACAAATGCAGGGTCA  |
| cyp2j12 | F | CTGATAGCACACTGGCTGGA    |
|         | R | GGTCCCTGTGAAGAGCTGTC    |
| rpl13a  | F | ACAAGAAAAAGCGGATGGTG    |
|         | R | TTCTCCTCCAGAGTGGCTGT    |
